# Supplementary material
Source: ML conference proceedings conference paper supplement (https://proceedings.neurips.cc/paper_files/paper/2017/hash/ef72d53990bc4805684c9b61fa64a102-Abstract.html)
Supplement: Supplementary file [file ef72d53990bc4805684c9b61fa64a102-Supplemental.zip]

## Appendix

### A Proof of Well-Definedness of Mutual Information

To prove the well-definedness of  $I(X; Y)$ , we need to show that  $P_{XY}$  is absolutely continuous with respect to  $P_X P_Y$ . That is equivalent to show that for any measurable set  $A \subseteq \mathcal{X} \times \mathcal{Y}$  such that  $P_X P_Y(A) = 0$ , we have  $P_{XY}(A) = 0$ . We will prove the contrapositive statement: for any measurable set  $A \subseteq \mathcal{X} \times \mathcal{Y}$  such that  $P_{XY}(A) > 0$ , we have  $P_X P_Y(A) > 0$ . Consider a simple case that  $A$  is a rectangle set, i.e.  $A$  can be written as  $A = A^x \times A^y$ , where  $A^x, A^y$  are measurable sets in  $\mathcal{X}$  and  $\mathcal{Y}$  respectively. Then

$$\begin{aligned} P_X P_Y(A) &= P_X(A^x) P_Y(A^y) = P_{XY}(A^x \times \mathcal{Y}) P_{XY}(\mathcal{X} \times A^y) \\ &\geq P_{XY}(A) P_{XY}(A) = (P_{XY}(A))^2 > 0 \end{aligned} \quad (10)$$

Since  $\mathcal{X}$  and  $\mathcal{Y}$  are Euclidean spaces, for any measurable set  $A \subseteq \mathcal{X} \times \mathcal{Y}$ , we can decompose  $A$  as a countable union of disjoint rectangle sets. Let  $A = \bigcup_{i=1}^{\infty} A_i$ , where  $A_i = A_i^x \times A_i^y$ . Since  $P_{XY}(A) > 0$ , there exists  $A_i$  such that  $P_{XY}(A_i) > 0$ , so  $P_X P_Y(A_i) > 0$ . Therefore,  $P_X P_Y(A) > 0$ .

Given that  $P_{XY}$  is absolutely continuous with respect to  $P_X P_Y$ , by Radon-Nikodym theorem, there exists a function  $f$  such that for any measurable set  $A$ ,  $\int_A f dP_X P_Y = P_{XY}(A)$ . This  $f$  is the Radon-Nikodym derivative  $\frac{dP_{XY}}{dP_X P_Y}$  in (1).

### B Proof of Theorem 1

To prove the asymptotic unbiasedness of the estimator, we need to write the Radon-Nikodym derivative in an explicit form. The following lemma gives the explicit form of  $\frac{dP_{XY}}{dP_X P_Y}$ .

**Lemma B.1.** *Under Assumption 3 and 4 in Theorem 1,  $\frac{dP_{XY}}{dP_X P_Y} = f(x, y) = \lim_{r \rightarrow 0} \frac{P_{XY}(x, y, r)}{P_X(x, r) P_Y(y, r)}$ .*

Now notice that  $\widehat{I}_N(X; Y) = \frac{1}{N} \sum_{i=1}^N \xi_i$ , where all  $\xi_i$  are identically distributed. Therefore,  $\mathbb{E}[\widehat{I}_N(X; Y)] = \mathbb{E}[\xi_1]$ . Therefore, the bias can be written as:

$$\begin{aligned} \left| \mathbb{E}[\widehat{I}_N(X; Y)] - I(X; Y) \right| &= \left| \mathbb{E}_{XY} [\mathbb{E}[\xi_1 | X, Y]] - \int \log f(X, Y) P_{XY} \right| \\ &\leq \int \left| \mathbb{E}[\xi_1 | X, Y] - \log f(X, Y) \right| dP_{XY}. \end{aligned} \quad (11)$$

Now we will give upper bounds for  $\left| \mathbb{E}[\xi_1 | X, Y] - \log f(X, Y) \right|$  for every  $(x, y) \in \mathcal{X} \times \mathcal{Y}$ . We will divide the space into three parts as  $\mathcal{X} \times \mathcal{Y} = \Omega_1 \cup \Omega_2 \cup \Omega_3$  where

- $\Omega_1 = \{(x, y) : f(x, y) = 0\}$ ;
- $\Omega_2 = \{(x, y) : f(x, y) > 0, P_{XY}(x, y, 0) > 0\}$ ;
- $\Omega_3 = \{(x, y) : f(x, y) > 0, P_{XY}(x, y, 0) = 0\}$ .

We will show that  $\lim_{N \rightarrow \infty} \int_{\Omega_i} \left| \mathbb{E}[\xi_1 | (X, Y) = (x, y)] - \log f(x, y) \right| dP_{XY} = 0$  for each  $i \in \{1, 2, 3\}$  separately.

$(x, y) \in \Omega_1$ : In this case, we will show that  $\Omega_1$  has zero probability with respect to  $P_{XY}$ .

$$P_{XY}(\Omega_1) = \int_{\Omega_1} dP_{XY} = \int_{\Omega_1} f(X, Y) dP_X P_Y = \int_{\Omega_1} 0 dP_X P_Y = 0 \quad (12)$$

Therefore,  $\int_{\Omega_1} \left| \mathbb{E}[\xi_1 | X, Y] - \log f(X, Y) \right| dP_{XY} = 0$ .

$(x, y) \in \Omega_2$ : In this case,  $f(x, y)$  is just  $P_{XY}(x, y, 0)/P_X(x, 0)P_Y(y, 0)$ . We will first show that the probability that the  $k$ -nearest neighbor distance  $\rho_{k,1} > 0$  is small. Then with high probability, we will use the number of samples on  $(x, y)$  as  $\tilde{k}_i$ , and we will show that the mean of estimate  $\xi_1$  is closed to  $\log f(x, y)$ .

First, the probability of  $\rho_{k,1} > 0$  is upper bounded by:

$$\begin{aligned}
& \mathbb{P}(\rho_{k,1} > 0 | (X, Y) = (x, y)) \\
&= \sum_{m=0}^{k-1} \binom{N-1}{m} P_{XY}(x, y, 0)^m (1 - P_{XY}(x, y, 0))^{N-1-m} \\
&\leq \sum_{m=0}^{k-1} N^m (1 - P_{XY}(x, y, 0))^{N-k} \\
&\leq kN^k (1 - P_{XY}(x, y, 0))^{N-k} \\
&\leq kN^k e^{-(N-k)P_{XY}(x, y, 0)}.
\end{aligned} \tag{13}$$

Conditioning on the event that  $\rho_{k,1} = 0$ , we have  $\xi_1 = \psi(\tilde{k}_1) + \log N - \log(n_{x,1} + 1) - \log(n_{y,1} + 1)$ , where the distribution of  $\tilde{k}_1$ ,  $n_{x,1}$  and  $n_{y,1}$  are given by the following lemma.

**Lemma B.2.** *Given  $(X, Y) = (x, y)$  and  $\rho_{k,1} = 0$ , then  $\tilde{k}_1 - k$  is distributed as  $\text{Bino}(N - k - 1, P_{XY}(x, y, 0))$ ;  $n_{x,1} - k$  is distributed as  $\text{Bino}(N - k - 1, P_X(x, 0))$ ;  $n_{y,1} - k$  is distributed as  $\text{Bino}(N - k - 1, P_Y(y, 0))$ . Given  $(X, Y) = (x, y)$  and  $\rho_{k,1} = r > 0$ , then  $n_{x,1} - k$  is distributed as  $\text{Bino}(N - k - 1, \frac{P_X(x, r) - P_{XY}(x, y, r)}{1 - P_{XY}(x, y, r)})$ ;  $n_{y,1} - k$  is distributed as  $\text{Bino}(N - k - 1, \frac{P_Y(y, r) - P_{XY}(x, y, r)}{1 - P_{XY}(x, y, r)})$ .*

Then we write  $\left| \mathbb{E}[\xi_1 | (X, Y) = (x, y), \rho_{k,1} = 0] - \log f(x, y) \right|$  as

$$\begin{aligned}
& \left| \mathbb{E}[\xi_1 | (X, Y) = (x, y), \rho_{k,1} = 0] - \log f(x, y) \right| \\
&= \left| \mathbb{E} \left[ \psi(\tilde{k}_1) + \log N - \log(n_{x,1} + 1) - \log(n_{y,1} + 1) | (X, Y) = (x, y), \rho_{k,1} = 0 \right] \right. \\
&\quad \left. - \log \frac{P_{XY}(x, y, 0)}{P_X(x, 0)P_Y(y, 0)} \right| \\
&\leq \left| \mathbb{E}[\log(n_{x,1} + 1) | (X, Y) = (x, y), \rho_{k,1} = 0] - \log NP_X(x, 0) \right| \\
&\quad + \left| \mathbb{E}[\log(n_{y,1} + 1) | (X, Y) = (x, y), \rho_{k,1} = 0] - \log NP_Y(y, 0) \right| \\
&\quad + \left| \mathbb{E}[\psi(\tilde{k}_1) | (X, Y) = (x, y), \rho_{k,1} = 0] - \log NP_{XY}(x, y, 0) \right|
\end{aligned} \tag{14}$$

By Lemma B.2, we know that  $n_{x,i} - k$  is distributed as  $\text{Bino}(N - k - 1, P_X(x, 0))$ . The following lemma establishes the mean of  $\log(n_{x,i} + 1)$ .

**Lemma B.3.** *If  $X$  is distributed as  $\text{Bino}(N, p)$ , then  $|\mathbb{E}[\log(X + k)] - \log(Np + k)| \leq C/(Np + k)$  for some constant  $C$ .*

Therefore, the first term of (14) is bounded by:

$$\begin{aligned}
& \left| \mathbb{E}[\log(n_{x,1} + 1) | (X, Y) = (x, y), \rho_{k,1} = 0] - \log NP_X(x, 0) \right| \\
&\leq \left| \mathbb{E}[\log(n_{x,1} + 1) | (X, Y) = (x, y), \rho_{k,1} = 0] - \log((N - k - 1)P_X(x, 0) + k + 1) \right| \\
&\quad + \left| \log((N - k - 1)P_X(x, 0) + k + 1) - \log NP_X(x, 0) \right| \\
&\leq \frac{C}{(N - k - 1)P_X(x, 0) + k + 1} + \left| \log \frac{(N - k - 1)P_X(x, 0) + k + 1}{NP_X(x, 0)} \right| \\
&\leq \frac{C}{NP_X(x, 0)} + \log \left( 1 + \frac{(k + 1)(1 - P_X(x, 0))}{NP_X(x, 0)} \right) \\
&\leq \frac{C}{NP_X(x, 0)} + \frac{(k + 1)(1 - P_X(x, 0))}{NP_X(x, 0)} \leq \frac{k + C + 1}{NP_X(x, 0)}.
\end{aligned} \tag{15}$$

where we use the fact that  $\log(1+x) < x$  for all  $x > 0$ . Similarly, the second term of (14) is bounded by:  $(k+C+1)/(NP_Y(y,0))$ . For the third term, notice that  $|\psi(x) - \log(x)| \leq 1/x$  for every integer  $x \geq 1$ , therefore,  $|\psi(\tilde{k}_1) - \log(\tilde{k}_1)| \leq 1/\tilde{k}_1 \leq 1/k$ . So the third term of (14) is bounded by:  $(k+C+1)/(NP_{XY}(x,y,0)) + 1/k$ . By Combining three terms together and noticing that  $P_X(x,0) \geq P_{XY}(x,y,0)$  and  $P_Y(y,0) \geq P_{XY}(x,y,0)$ , we obtain

$$\begin{aligned} & \left| \mathbb{E}[\xi_1|(X,Y) = (x,y), \rho_{k,1} = 0] - \log f(x,y) \right| \\ & \leq \frac{k+C+1}{NP_X(x,0)} + \frac{k+C+1}{NP_Y(y,0)} + \frac{k+C+1}{NP_{XY}(x,y,0)} + \frac{1}{k} \leq \frac{3k+3C+3}{NP_{XY}(x,y,0)} + \frac{1}{k}. \end{aligned} \quad (16)$$

Combine with the case that  $\rho_{i,xy} > 0$ , we obtain that:

$$\begin{aligned} & \left| \mathbb{E}[\xi_1|(X,Y) = (x,y)] - \log f(x,y) \right| \\ & \leq \left| \mathbb{E}[\xi_1|(X,Y) = (x,y), \rho_{k,1} > 0] - \log f(x,y) \right| \times \mathbb{P}(\rho_{k,1} > 0) \\ & \quad + \left| \mathbb{E}[\xi_1|(X,Y) = (x,y), \rho_{k,1} = 0] - \log f(x,y) \right| \times \mathbb{P}(\rho_{k,1} = 0) \\ & \leq (2 \log N + |\log f(x,y)|)kN^k e^{-(N-k)P_{XY}(x,y,0)} + \frac{3k+3C+3}{NP_{XY}(x,y,0)} + \frac{1}{k}, \end{aligned} \quad (17)$$

where the first term comes from triangle inequality and the fact that  $|\xi_1| \leq 2 \log N$ . Integrating over  $\Omega_2$ , we have:

$$\begin{aligned} & \int_{\Omega_2} \left| \mathbb{E}[\xi_1|(X,Y) = (x,y)] - \log f(x,y) \right| dP_{XY} \\ & \leq \int_{\Omega_2} (2 \log N + |\log f(x,y)|)kN^k e^{-(N-k)P_{XY}(x,y,0)} dP_{XY} \\ & \quad + \frac{3k+3C+3}{N} \int_{\Omega_2} \frac{1}{P_{XY}(x,y,0)} dP_{XY} + \frac{1}{k} \\ & \leq (2 \log N + \int_{\Omega_2} |\log f(x,y)| dP_{XY})kN^k e^{-(N-k) \inf_{(x,y) \in \Omega_2} P_{XY}(x,y,0)} \\ & \quad + \frac{3k+3C+3}{N} \mu(\Omega_2) + \frac{1}{k}, \end{aligned} \quad (18)$$

where  $\mu$  denotes counting measure. By Assumption 1,  $k$  goes to infinity as  $N$  goes to infinity, so  $1/k$  vanishes as  $N$  increases. By Assumption 1 and 2,  $k/N$  goes to 0 and  $\Omega_2$  has finite counting measure, so the second term also vanishes. Since  $\Omega_2$  has finite counting measure, so  $\inf_{(x,y) \in \Omega_2} P_{XY}(x,y,0) = \epsilon > 0$ . By Assumption 5,  $\int_{\Omega_2} |\log f(x,y)| dP_{XY} < +\infty$ . Therefore, for sufficiently large  $N$ , the first term also vanishes. Therefore,

$$\lim_{N \rightarrow \infty} \int_{\Omega_2} \left| \mathbb{E}[\xi_1|(X,Y) = (x,y)] - \log f(x,y) \right| dP_{XY} = 0. \quad (19)$$

$(x,y) \in \Omega_3$ : In this case,  $P_{XY}(x,y,r)$  is a monotonic function of  $r$  such that  $P_{XY}(x,y,0) = 0$  and  $\lim_{r \rightarrow \infty} P_{XY}(x,y,r) = 1$ . Hence, we can view  $\log(P_{XY}(x,y,r)/P_X(x,r)P_Y(y,r))$  as a function of  $P_{XY}(x,y,r)$ , and it converges to  $\log f(x,y)$  as  $P_{XY}(x,y,r) \rightarrow 0$ , for almost every  $(x,y)$ . Since  $P_{XY}(\Omega_3) \leq 1 < +\infty$  and  $\int_{\Omega_3} |\log f(x,y)| dP_{XY} < +\infty$ . Then by Egoroff's Theorem, for any  $\epsilon > 0$ , there exists a subset  $E \subseteq \Omega_3$  with  $P_{XY}(E) < \epsilon$  and  $\int_E |\log f(x,y)| dP_{XY} < \epsilon$ , such that  $\log(P_{XY}(x,y,r)/P_X(x,r)P_Y(y,r))$  converges as  $P_{XY}(x,y,r) \rightarrow 0$ , uniformly on  $\Omega_3 \setminus E$ . For  $(x,y) \in E$ , notice that  $|\xi_1| \leq 2 \log N$ , so we have:

$$\begin{aligned} & \int_E \left| \mathbb{E}[\xi_1|(X,Y) = (x,y)] - \log f(x,y) \right| dP_{XY} \\ & \leq \int_E (2 \log N + |\log f(x,y)|) dP_{XY} < (2 \log N + 1)\epsilon. \end{aligned} \quad (20)$$

By choosing  $\epsilon$  appropriately, we will have  $\lim_{N \rightarrow \infty} \int_E \left| \mathbb{E}[\xi_1|(X,Y) = (x,y)] - \log f(x,y) \right| dP_{XY} = 0$ .

Now for any  $(x, y) \in \Omega_3 \setminus E$ , since  $P_{XY}(x, y, 0) = 0$ , we know that  $\mathbb{P}(\rho_{k,1} = 0 | (X, Y) = (x, y)) = 0$ , so  $\tilde{k}_1 = k$  with probability 1. Conditioning on  $\rho_{k,1} = r > 0$ , the difference  $\left| \mathbb{E}[\xi_1 | (X, Y) = (x, y)] - \log f(x, y) \right|$  can be decomposed into four parts as follows

$$\begin{aligned} & \left| \mathbb{E}[\xi_1 | (X, Y) = (x, y)] - \log f(x, y) \right| \\ &= \left| \int_{r=0}^{\infty} (\mathbb{E}[\xi_1 | (X, Y) = (x, y), \rho_{k,1} = r] - \log f(x, y)) dF_{\rho_{k,1}}(r) \right| \\ &\leq \left| \int_{r=0}^{\infty} \left( \log \frac{P_{XY}(x, y, r)}{P_X(x, r)P_Y(y, r)} - \log f(x, y) \right) dF_{\rho_{k,1}}(r) \right| \end{aligned} \quad (21)$$

$$+ \left| \int_{r=0}^{\infty} (\psi(k) - \log N - \log P_{XY}(x, y, r)) dF_{\rho_{k,1}}(r) \right| \quad (22)$$

$$+ \left| \int_{r=0}^{\infty} (\mathbb{E}[\log(n_{x,1} + 1) | (X, Y, \rho_{k,1}) = (x, y, r)] - \log(NP_X(x, r))) dF_{\rho_{k,1}}(r) \right| \quad (23)$$

$$+ \left| \int_{r=0}^{\infty} (\mathbb{E}[\log(n_{y,1} + 1) | (X, Y, \rho_{k,1}) = (x, y, r)] - \log(NP_Y(y, r))) dF_{\rho_{k,1}}(r) \right| \quad (24)$$

here  $F_{\rho_{k,1}}(r)$  is the CDF of the  $k$ -nearest neighbor distance  $\rho_{k,1}$ , given  $(X, Y) = (x, y)$ . By results of order statistics, its derivative with respect to  $P_{XY}(x, y, r)$  is given by:

$$\frac{dF_{\rho_{k,1}}(r)}{dP_{XY}(x, y, r)} = \frac{(N-1)!}{(k-1)!(N-k-1)!} P_{XY}(x, y, r)^{k-1} (1 - P_{XY}(x, y, r))^{N-k-1}. \quad (25)$$

Now we consider the four terms separately. For (21), since  $\log(P_{XY}(x, y, r)/P_X(x, r)P_Y(y, r))$  converges as  $P_{XY}(x, y, r) \rightarrow 0$ , uniformly on  $\Omega_3 \setminus E$ . So for every  $(x, y) \in \Omega_3 \setminus E$ , there exists an  $r_N$  such that  $P_{XY}(x, y, r_N) = 4k \log N/N$  and  $|\log(P_{XY}(x, y, r)/P_X(x, r)P_Y(y, r)) - \log f(x, y)| < \delta_N$  for every  $r \leq r_N$ . Here  $r_N$  may depend on  $(x, y)$ , but  $\delta_N$  does not depend on  $(x, y)$  and  $\lim_{N \rightarrow \infty} \delta_N = 0$ . Therefore, (21) is upper bounded by:

$$\begin{aligned} & \left| \int_{r=0}^{\infty} \left( \log \frac{P_{XY}(x, y, r)}{P_X(x, r)P_Y(y, r)} - \log f(x, y) \right) dF_{\rho_{k,1}}(r) \right| \\ &\leq \int_{r=0}^{r_N} \left| \log \frac{P_{XY}(x, y, r)}{P_X(x, r)P_Y(y, r)} - \log f(x, y) \right| dF_{\rho_{k,1}}(r) \\ &\quad + \int_{r=r_N}^{\infty} \left| \log \frac{P_{XY}(x, y, r)}{P_X(x, r)P_Y(y, r)} - \log f(x, y) \right| dF_{\rho_{k,1}}(r) \\ &\leq \delta_N \mathbb{P}(\rho_{k,1} \leq r_N | (X, Y) = (x, y)) \\ &\quad + \left( \sup_{r \geq r_N} \left| \log \frac{P_{XY}(x, y, r)}{P_X(x, r)P_Y(y, r)} - \log f(x, y) \right| \right) \mathbb{P}(\rho_{k,1} > r_N | (X, Y) = (x, y)) \end{aligned} \quad (26)$$

Firstly, the probability  $\mathbb{P}(\rho_{k,1} \leq r_N | (X, Y) = (x, y))$  is smaller than 1. Secondly, since  $P_X(x, y, r) \geq 4k \log N/N > 1/N$  for  $r \geq r_N$ , so we have  $|\log P_{XY}(x, y, r)| \leq \log N$ . The same bounds apply for  $|\log P_X(x, r)|$  and  $|\log P_Y(y, r)|$  as well. By triangle inequality, the supremum is upper bounded by  $3 \log N + |\log f(x, y)|$ . Finally, the probability  $\mathbb{P}(\rho_{k,1} > r_N | (X, Y) = (x, y))$  is upper bounded by

$$\begin{aligned} & \mathbb{P}(\rho_{k,1} > r_N | (X, Y) = (x, y)) \\ &= \sum_{m=0}^{k-1} \binom{N-1}{m} P_{XY}(x, y, r_N)^m (1 - P_{XY}(x, y, r_N))^{N-1-m} \\ &\leq \sum_{m=0}^{k-1} N^m (1 - P_{XY}(x, y, r_N))^{N-k} \\ &= kN^k \left(1 - \frac{4k \log N}{N}\right)^{N/2} \\ &\leq kN^k e^{-2k \log N} = \frac{k}{N^k}. \end{aligned} \quad (27)$$

for sufficiently large  $N$  such that  $N - k > N/2$ . Therefore, (21) is upper bounded by

$$\begin{aligned} & \left| \int_{r=0}^{\infty} \left( \log \frac{P_{XY}(x, y, r)}{P_X(x, r)P_Y(y, r)} - \log f(x, y) \right) dF_{\rho_{k,1}}(r) \right| \\ & \leq \delta_N + \frac{k(3 \log N + |\log f(x, y)|)}{N^k}. \end{aligned} \quad (28)$$

For (22), we simply plug in  $F_{\rho_{k,1}}(r)$  and integrate over  $P_{XY}(x, y, r)$  and obtain

$$\begin{aligned} & \int_{r=0}^{\infty} (\psi(k) - \log N - \log P_{XY}(x, y, r)) dF_{\rho_{k,1}}(r) \\ & = \psi(k) - \log N - \frac{(N-1)!}{(k-1)!(N-k-1)!} \\ & \quad \times \int_{r=0}^{\infty} (\log P_{XY}(x, y, r)) P_{XY}(x, y, r)^{k-1} (1 - P_{XY}(x, y, r))^{N-k-1} dP_{XY}(x, y, r) \\ & = \psi(k) - \log N - \frac{(N-1)!}{(k-1)!(N-k-1)!} \int_{t=0}^1 (\log t) t^{k-1} (1-t)^{N-k-1} dt \\ & = \psi(k) - \log N - (\psi(k) - \psi(N)) = \psi(N) - \log N. \end{aligned} \quad (29)$$

where we use the fact that  $\psi(k) - \psi(N) = \frac{(N-1)!}{(k-1)!(N-k-1)!} \int_{t=0}^1 (\log t) t^{k-1} (1-t)^{N-k-1} dt$ . Notice that  $\psi(N) < \log N$  and  $\lim_{N \rightarrow 0} (\psi(N) - \log N) = 0$ .

For (23), recall that in Lemma B.2, we have shown that conditioning on  $(X, Y) = (x, y)$  and  $\rho_{k,1} = r > 0$ ,  $n_{x,1} - k$  is distributed as  $\text{Bino}(N - k - 1, (P_X(x, r) - P_{XY}(x, y, r))/(1 - P_{XY}(x, y, r)))$ . The expectation  $\mathbb{E}[\log(n_{x,1} + 1) | (X, Y) = (x, y), \rho_{k,1} = r]$  is given by Lemma B.3. Therefore, we can rewrite the term (23) as:

$$\begin{aligned} & \left| \int_{r=0}^{\infty} (\mathbb{E}[\log(n_{x,1} + 1) | (X, Y) = (x, y), \rho_{k,1} = r] - \log N - \log P_X(x, r)) dF_{\rho_{k,1}}(r) \right| \\ & \leq \left| \int_{r=0}^{\infty} \left( \mathbb{E}[\log(n_{x,1} + 1) | (X, Y) = (x, y), \rho_{k,1} = r] \right. \right. \\ & \quad \left. \left. - \log \left( (N - k - 1) \frac{P_X(x, r) - P_{XY}(x, y, r)}{1 - P_{XY}(x, y, r)} + k + 1 \right) \right) dF_{\rho_{k,1}}(r) \right| \\ & \quad + \left| \int_{r=0}^{\infty} \left( \log \frac{(N - k - 1) \frac{P_X(x, r) - P_{XY}(x, y, r)}{1 - P_{XY}(x, y, r)} + k + 1}{NP_X(x, r)} \right) dF_{\rho_{k,1}}(r) \right| \\ & \leq \int_{r=0}^{\infty} \left| \mathbb{E}[\log(n_{x,1} + 1) | (X, Y) = (x, y), \rho_{k,1} = r] \right. \\ & \quad \left. - \log \left( (N - k - 1) \frac{P_X(x, r) - P_{XY}(x, y, r)}{1 - P_{XY}(x, y, r)} + k + 1 \right) \right| dF_{\rho_{k,1}}(r) \end{aligned} \quad (30)$$

$$+ \left| \mathbb{E}_r \left[ \log \left( \frac{N(P_X(x, r) - P_{XY}(x, y, r)) + (k + 1)(1 - P_X(x, r))}{NP_X(x, r)(1 - P_{XY}(x, y, r))} \right) \right] \right|. \quad (31)$$

where  $\mathbb{E}_r$  denotes expectation over  $F_{\rho_{i,xy}}$ . By Lemma B.3, the term (30) is upper bounded by

$$\begin{aligned} & \int_{r=0}^{\infty} \left| \mathbb{E}[\log(n_{x,1} + 1) | (X, Y) = (x, y), \rho_{k,1} = r] \right. \\ & \quad \left. - \log \left( (N - k - 1) \frac{P_X(x, r) - P_{XY}(x, y, r)}{1 - P_{XY}(x, y, r)} + k + 1 \right) \right| dF_{\rho_{k,1}}(r) \\ & \leq \int_{r=0}^{\infty} \frac{C}{(N - k - 1) \frac{P_X(x, r) - P_{XY}(x, y, r)}{1 - P_{XY}(x, y, r)} + k + 1} dF_{\rho_{k,1}}(r) \\ & \leq \int_{r=0}^{\infty} \frac{C}{k + 1} dF_{\rho_{k,1}}(r) = \frac{C}{k + 1}. \end{aligned} \quad (32)$$

For (31), by the fact that  $\log(x/y) \leq (x-y)/y$  for all  $x, y > 0$  and Cauchy-Schwarz inequality, we have the following:

$$\begin{aligned}
& \mathbb{E}_r \left[ \log \left( \frac{N(P_X(x, r) - P_{XY}(x, y, r)) + (k+1)(1 - P_X(x, r))}{NP_X(x, r)(1 - P_{XY}(x, y, r))} \right) \right] \\
& \leq \mathbb{E}_r \left[ \frac{N(P_X(x, r) - P_{XY}(x, y, r)) + (k+1)(1 - P_X(x, r))}{NP_X(x, r)(1 - P_{XY}(x, y, r))} - 1 \right] \\
& = \mathbb{E}_r \left[ \frac{(k+1 - NP_{XY}(x, y, r))(1 - P_X(x, r))}{NP_X(x, r)(1 - P_{XY}(x, y, r))} \right] \\
& \leq \sqrt{\mathbb{E}_r \left[ \left( \frac{k+1 - NP_{XY}(x, y, r)}{NP_{XY}(x, y, r)} \right)^2 \right] \mathbb{E}_r \left[ \left( \frac{P_{XY}(x, y, r)(1 - P_X(x, r))}{P_X(x, r)(1 - P_{XY}(x, y, r))} \right)^2 \right]}. \quad (33)
\end{aligned}$$

Notice that  $P_X(x, r) \geq P_{XY}(x, y, r)$  for all  $r$ , so the second expectation is always no larger than 1. For the first expectation, we plug in  $F_{\rho_{k,1}}(r)$  and integrate over  $P_{XY}(x, y, r)$ , let  $t = P_{XY}(x, y, r)$  and observe,

$$\begin{aligned}
& \mathbb{E}_r \left[ \left( \frac{k+1 - NP_{XY}(x, y, r)}{NP_{XY}(x, y, r)} \right)^2 \right] \\
& = \int_{r=0}^{\infty} \left( \frac{k+1 - NP_{XY}(x, y, r)}{NP_{XY}(x, y, r)} \right)^2 dF_{\rho_{k,1}}(r) \\
& = \frac{(N-1)!}{(k-1)!(N-k-1)!} \int_{t=0}^1 \frac{(k+1 - Nt)^2}{N^2 t^2} t^{k-1} (1-t)^{N-k-1} dt \\
& = \frac{(N-1)!}{(k-1)!(N-k-1)!} \frac{(k+1)^2}{N^2} \int_{t=0}^1 t^{k-3} (1-t)^{N-k-1} dt \\
& \quad - \frac{(N-1)!}{(k-1)!(N-k-1)!} \frac{2(k+1)}{N^2} \int_{t=0}^1 t^{k-2} (1-t)^{N-k-1} dt \\
& \quad + \frac{(N-1)!}{(k-1)!(N-k-1)!} \int_{t=0}^1 t^{k-3} (1-t)^{N-k-1} dt \\
& = \frac{(N-1)!}{(k-1)!(N-k-1)!} \frac{(k+1)^2}{N^2} \frac{(k-3)!(N-k-1)!}{(N-3)!} \\
& \quad - \frac{(N-1)!}{(k-1)!(N-k-1)!} \frac{2(k+1)}{N^2} \frac{(k-2)!(N-k-1)!}{(N-2)!} + 1 \\
& = \frac{(N-1)(N-2)(k+1)^2}{N^2(k-1)(k-2)} - \frac{2(N-1)(k+1)}{N(k-1)} + 1. \quad (34)
\end{aligned}$$

For sufficiently large  $N$  and  $k$ , it is upper bounded by  $C_1(1/N + 1/k)$  for some constant  $C_1 > 0$ . Therefore,

$$\mathbb{E}_r \left[ \log \left( \frac{N(P_X(x, r) - P_{XY}(x, y, r)) + (k+1)(1 - P_X(x, r))}{NP_X(x, r)(1 - P_{XY}(x, y, r))} \right) \right] \leq \sqrt{C_1 \left( \frac{1}{N} + \frac{1}{k} \right)}. \quad (35)$$

Similarly, by using the fact that  $\log(x/y) > (x-y)/x$  and Cauchy-Schwarz inequality again, we conclude that there are some constant  $C_2 > 0$  such that

$$\mathbb{E}_r \left[ \log \left( \frac{N(P_X(x, r) - P_{XY}(x, y, r)) + (k+1)(1 - P_X(x, r))}{NP_X(x, r)(1 - P_{XY}(x, y, r))} \right) \right] \geq -\sqrt{C_2 \left( \frac{1}{N} + \frac{1}{k} \right)}. \quad (36)$$

Therefore, by combining (32), (35) and (36), we obtain

$$\begin{aligned}
& \left| \int_{r=0}^{\infty} (\mathbb{E}[\log(n_{x,1} + 1) | (X, Y) = (x, y), \rho_{k,1} = r] - \log N - \log P_X(x, r)) dF_{\rho_{k,1}}(r) \right| \\
& \leq \frac{C}{k+1} + \sqrt{C' \left( \frac{1}{N} + \frac{1}{k} \right)}. \quad (37)
\end{aligned}$$

where  $C' = \max\{C_1, C_2\}$ . Since (24) and (23) are symmetric, the same upper bound (37) also applies to (24). Combine (28), (29) and (37), we have

$$\begin{aligned} & \left| \mathbb{E} [\xi_1 | (X, Y) = (x, y)] - \log f(x, y) \right| \\ & \leq \delta_N + \frac{k(3 \log N + |\log f(x, y)|)}{N^k} + \log N - \psi(N) + \frac{2C}{k+1} + 2\sqrt{C'(\frac{1}{N} + \frac{1}{k})} \end{aligned} \quad (38)$$

for every  $(x, y) \in \Omega_3 \setminus E$ . By integration over  $\Omega_3 \setminus E$ , we have

$$\begin{aligned} & \int_{\Omega_3 \setminus E} \left| \mathbb{E} [\xi_1 | (X, Y) = (x, y)] - \log f(x, y) \right| dP_{XY} \\ & \leq \int_{\Omega_3 \setminus E} \left( \delta_N + \frac{k(3 \log N + |\log f(x, y)|)}{N^k} + \log N - \psi(N) \right. \\ & \quad \left. + \frac{2C}{k+1} + 2\sqrt{C'(\frac{1}{N} + \frac{1}{k})} \right) dP_{XY} \\ & \leq \delta_N + \frac{k(3 \log N + \int_{\mathcal{X} \times \mathcal{Y}} |\log f(x, y)| dP_{XY})}{N^k} + \log N - \psi(N) \\ & \quad + \frac{2C}{k+1} + 2\sqrt{C'(\frac{1}{N} + \frac{1}{k})}. \end{aligned} \quad (39)$$

By Assumption 1,  $k$  increases as  $N \rightarrow \infty$ . By Assumption 5,  $\int_{\mathcal{X} \times \mathcal{Y}} |\log f(x, y)| dP_{XY} < +\infty$ . Therefore, this quantity vanishes as  $N \rightarrow \infty$ . Combining with the case that  $(x, y) \in E$ , we have

$$\lim_{N \rightarrow \infty} \int_{\Omega_3} \left| \mathbb{E} [\xi_1 | (X, Y) = (x, y)] - \log f(x, y) \right| dP_{XY} = 0 \quad (40)$$

### B.1 Proof of Lemma B.1

We will need to prove that for any measurable set  $A \subseteq \mathcal{X} \times \mathcal{Y}$ , we have  $\int_A f dP_X P_Y = P_{XY}(A)$ . For any  $\epsilon > 0$ , by Egoroff's Theorem, there exists  $B \subseteq \mathcal{X} \times \mathcal{Y}$  such that  $P_{XY}(B^C) < \epsilon$ ,  $P_X P_Y(B^C) < \epsilon$  and  $P_{XY}(x, y, r)/P_X(x, r)P_Y(y, r)$  converges to  $f(x, y)$  uniformly on  $B$ . Now we have:

$$\begin{aligned} & |P_{XY}(A) - \int_A f dP_X P_Y| \\ & = |P_{XY}(A \cap B) + P_{XY}(A \cap B^C) - \int_{A \cap B} f dP_X P_Y - \int_{A \cap B^C} f dP_X P_Y| \\ & \leq |P_{XY}(A \cap B) - \int_{A \cap B} f dP_X P_Y| + P_{XY}(A \cap B^C) + \int_{A \cap B^C} f dP_X P_Y \\ & \leq |P_{XY}(A \cap B) - \int_{A \cap B} f dP_X P_Y| + P_{XY}(B^C) + C P_X P_Y(B^C) \\ & \leq |P_{XY}(A \cap B) - \int_{A \cap B} f dP_X P_Y| + \epsilon(1 + C), \end{aligned} \quad (41)$$

where  $C$  is the upper bound for  $f(x, y)$  in Assumption 3. Now we need to deal with the first term of (41). By Assumption 4,  $\mathcal{X} \times \mathcal{Y}$  can be decomposed into countable disjoint sets  $\{E_i\}_{i=1}^\infty$  such that  $f(x, y)$  is uniformly continuous on each  $E_i$ , so by define  $A_i = A \cap B \cap E_i$ , we have

$$|P_{XY}(A \cap B) - \int_{A \cap B} f dP_X P_Y| \leq \sum_{i=1}^\infty |P_{XY}(A_i) - \int_{A_i} f dP_X P_Y|. \quad (42)$$

Since  $f(x, y)$  is uniformly continuous on  $E_i$ , so there exists  $\delta_1 > 0$  such that for every  $(x_1, y_1) \in A_i \subseteq E_i$  and  $(x_2, y_2) \in A_i \subseteq E_i$  such that  $\|x_1 - x_2\| < \delta_1$  and  $\|y_1 - y_2\| < \delta_1$ , we have  $|f(x_1, y_1) - f(x_2, y_2)| < \epsilon$ . Additionally, since  $P_{XY}(x, y, r)/P_X(x, r)P_Y(y, r)$  converges to  $f(x, y)$  uniformly on  $B$ , there exists  $\delta_2 > 0$  such that for every  $(x, y) \in A_i \subseteq B$  and  $r < \delta_2$ , we have  $|P_X Y(x, y, r)/P_X(x, r)P_Y(y, r) - f(x, y)| < \epsilon$ . Take  $\delta = \min\{\delta_1, \delta_2\}$ . Since  $A_i$  is a subset

of Euclidean space, we can decompose  $A_i$  as  $A_i = \bigcup_{j=1}^{\infty} A_{ij}$ , where  $A_{ij}$  is a square set centered at  $(x_{ij}, y_{ij})$  with radius  $r_{ij} < \delta$ . Then consider the following simple function  $\phi(x, y)$ ,

$$\phi(x, y) \equiv \begin{cases} \frac{P_{XY}(A_{ij})}{P_X(A_i)P_Y(A_i)} = \frac{P_{XY}(x_{ij}, y_{ij}, r_{ij})}{P_X(x_{ij}, r_{ij})P_Y(y_{ij}, r_{ij})}, & \text{if } (x, y) \in A_{ij} \\ 0, & \text{otherwise} \end{cases}. \quad (43)$$

Then we have

$$\int_{A_i} \phi(x, y) dP_X P_Y = \sum_{j=1}^{\infty} \int_{A_{ij}} \frac{P_{XY}(A_{ij})}{P_X(A_i)P_Y(A_i)} dP_X P_Y = \sum_{j=1}^{\infty} P_{XY}(A_{ij}) = P_{XY}(A_i) \quad (44)$$

and

$$\begin{aligned} |\phi(x, y) - f(x, y)| &\leq \left| \frac{P_{XY}(x_{ij}, y_{ij}, r_{ij})}{P_X(x_{ij}, r_{ij})P_Y(y_{ij}, r_{ij})} - f(x_{ij}, y_{ij}) \right| + |f(x_{ij}, y_{ij}) - f(x, y)| \\ &\leq \epsilon + \epsilon = 2\epsilon \end{aligned} \quad (45)$$

for every  $(x, y) \in A_{ij}$ . Therefore, we have

$$\begin{aligned} |P_{XY}(A_i) - \int_{A_i} f dP_X P_Y| &= \left| \int_{A_i} \phi dP_X P_Y - \int_{A_i} f dP_X P_Y \right| \\ &\leq \int_{A_i} |\phi - f| dP_X P_Y \leq 2\epsilon P_X P_Y(A_i). \end{aligned} \quad (46)$$

Plug this to (42), we have:

$$|P_{XY}(A \cap B) - \int_{A \cap B} f dP_X P_Y| \leq \sum_{i=1}^{\infty} 2\epsilon P_X P_Y(A_i) = 2\epsilon P_X P_Y\left(\bigcup_{i=1}^{\infty} A_i\right) \leq 2\epsilon. \quad (47)$$

Plug this to (41), we have  $|P_{XY}(A) - \int_A f dP_X P_Y| < (3 + C)\epsilon$ . Notice that this statement holds for any  $\epsilon > 0$ . By choosing  $\epsilon \downarrow 0$ , we conclude that  $P_{XY}(A) = \int_A f dP_X P_Y$ . Hence,  $f$  is the Radon-Nikolym derivative.

## B.2 Proof of Lemma B.2

Given that  $(X_1, Y_1) = (x, y)$  and  $\rho_{k,1} = r$ , we sort the samples  $\{(X_i, Y_i)\}_{i=2}^N$  by their distance to  $(x, y)$  defined as  $d_i = \max\{\|X_i - x\|, \|Y_i - y\|\}$ . To avoid the case that two samples have identical distance, we introduce a set of random variables  $\{Z_i\}_{i=2}^N$  i.i.d. samples from  $\text{Unif}[0, 1]$  and define a comparison operator  $\prec$  as:

$$i \prec j \iff d_i < d_j \text{ or } \{d_i = d_j \text{ and } Z_i < Z_j\}. \quad (48)$$

Since for any  $i \neq j$ , the probability that  $Z_i = Z_j$  is zero, so we can have either  $i \prec j$  or  $i \succ j$  with probability 1. Now let  $\{2, 3, \dots, N\} = S \cup \{j\} \cup T$  be a partition of the indices with  $|S| = k - 1$  and  $|T| = N - k - 1$ . Define an event  $\mathcal{A}_{S,j,T}$  associated to the partition as:

$$\mathcal{A}_{S,j,T} = \{s \prec j, \forall s \in S, \text{ and } t \succ j, \forall t \in T\}. \quad (49)$$

Since  $(X_j, Y_j) = (x, y)$  are i.i.d. random variables each of the events  $\mathcal{A}_{S,j,T}$  has identical probability. The number of all partitions is  $\frac{(N-1)!}{(N-k-1)!(k-1)!}$  and thus  $\mathbb{P}(\mathcal{A}_{S,j,T}) = \frac{(N-k-1)!(k-1)!}{(N-1)!}$ . So the cdf of  $\tilde{k}_1$  is given by:

$$\begin{aligned} &\mathbb{P}(\tilde{k}_1 \leq k + m | \rho_{k,1} = r, (X_1, Y_1) = (x, y)) \\ &= \sum_{S,j,T} \mathbb{P}(\mathcal{A}_{S,j,T} | \rho_{k,1} = r, (X_1, Y_1) = (x, y)) \mathbb{P}(\tilde{k}_1 \leq k + m | \mathcal{A}_{S,j,T}, \rho_{k,1} = r, (X_1, Y_1) = (x, y)) \\ &= \frac{(N-k-1)!(k-1)!}{(N-1)!} \sum_{S,j,T} \mathbb{P}(\tilde{k}_1 \leq k + m | \mathcal{A}_{S,j,T}, \rho_{k,1} = r, (X_1, Y_1) = (x, y)) \end{aligned} \quad (50)$$

Now condition on event  $\mathcal{A}_{S,j,T}$  and  $\rho_{k,1} = r$ , namely  $(X_j, Y_j)$  is the  $k$ -nearest neighbor with distance  $r$ ,  $S$  is the set of samples with distance smaller than (or equal to)  $r$  and  $T$  is the set of samples with



distance greater than (or equal to)  $r$ . Recall that  $\tilde{k}_1$  is the number of samples with  $d_j \leq r$ . For any index  $s \in S \cup \{j\}$ ,  $d_j \leq r$  are satisfied. Therefore,  $\tilde{k}_1 \leq k + m$  means that there are no more than  $m$  samples in  $T$  with distance smaller than  $r$ . Let  $U_l = \mathbb{I}\{d_l \leq r \mid d_l \geq r\}$ . Therefore,

$$\begin{aligned} & \mathbb{P}\left(\tilde{k}_1 \leq k + m \mid \mathcal{A}_{S,j,T}, \rho_{k,1} = r, (X_1, Y_1) = (x, y)\right) \\ &= \mathbb{P}\left(\sum_{l \in T} \mathbb{I}\{d_l \leq r\} \leq m \mid d_s \leq r, \forall s \in S, d_j = r, d_t \geq r, \forall t \in T\right) \\ &= \mathbb{P}\left(\sum_{l \in T} \mathbb{I}\{d_l \leq r\} \leq m \mid d_l \geq r, \forall l \in T\right) = \mathbb{P}\left(\sum_{l \in T} U_l \leq m\right), \end{aligned} \quad (51)$$

where  $U_l$  follows bernoulli distribution with  $\mathbb{P}\{U_l = 1\} = \Pr\{d_l \leq r \mid d_l \geq r\}$ . We can drop the conditioning of  $(X_s, Y_s)$ 's for  $s \notin T$  since  $(X_s, Y_s)$  and  $(X_t, Y_t)$  are independent. Therefore, given that  $d_l \geq r$  for all  $l \in T$ , the variables  $\mathbb{I}\{d_l \leq r\}$  are i.i.d. and have the same distribution as  $U_l$ . We conclude:

$$\begin{aligned} & \mathbb{P}\left(\tilde{k}_1 \leq k + m \mid \rho_{k,1} = r, (X_1, Y_1) = (x, y)\right) \\ &= \frac{(N - k - 1)!(k - 1)!}{(N - 1)!} \sum_{S,j,T} \mathbb{P}\left(\tilde{k}_1 \leq k + m \mid \mathcal{A}_{S,j,T}, \rho_{i,xy} = r, (X_1, Y_1) = (x, y)\right) \\ &= \frac{(N - k - 1)!(k - 1)!}{(N - 1)!} \sum_{S,j,T} \mathbb{P}\left(\sum_{l \in T} U_l \leq m\right) = \mathbb{P}\left(\sum_{l \in T} U_l \leq m\right). \end{aligned} \quad (52)$$

Thus we have shown that  $\tilde{k}_i - k$  has the same distribution as  $\sum_{l \in T} U_l$ , which is a Binomial random variable with parameter  $|T| = N - k - 1$  and  $\mathbb{P}\{d_l \leq r \mid d_l \geq r\} = \mathbb{P}\{d_l = 0\} = P_{XY}(x, y, 0)$ . For  $n_{x,1}$  and  $n_{y,1}$ , we can follow the same proof and conclude that  $n_{x,i} - k$  and  $n_{y,i} - k$  are also Binomial random variables with  $|T| = N - k - 1$ . But the probabilities are different.

- If  $r = 0$ , then for  $n_{x,i}$ , the probability is  $\mathbb{P}\{\|X_l - x\| \leq 0 \mid d_l \geq 0\} = \mathbb{P}\{\|X_l - x\| = 0\} = P_X(x, 0)$  and the probability for  $n_{y,i}$  is  $P_Y(y, 0)$ .
- If  $r > 0$ , then for  $n_{x,i}$ , the probability is  $\mathbb{P}\{\|X_l - x\| \leq r \mid d_l \geq r\} = \frac{P_X(x, r) - P_{XY}(x, y, r)}{1 - P_{XY}(x, y, r)}$ . Similarly, the probability for  $n_{y,i}$  is  $\frac{P_Y(y, r) - P_{XY}(x, y, r)}{1 - P_{XY}(x, y, r)}$ .

### B.3 Proof of Lemma B.3

By Jensen's inequality, we know that  $\mathbb{E}[\log X] \leq \log \mathbb{E}[X] = \log(Np + k)$ . So it suffices to give an upper bound for  $\log(Np + k) - \mathbb{E}[\log X]$ . We consider two different cases.

(i)  $Np \geq k$ . In this case, for any  $x$ , by applying Taylor's theorem around  $x_0 = Np + k$ , there exists  $\zeta$  between  $x$  and  $x_0$  such that

$$\log(x) = \log(Np + k) + \frac{x - Np - k}{Np + k} - \frac{(x - Np - k)^2}{2\zeta^2} \quad (53)$$

By noticing that  $\zeta \geq \min\{x, x_0\} = \min\{x, Np + k\}$ , we have

$$\begin{aligned} & -\log(x) + \log(Np + k) + \frac{x - Np - k}{Np + k} = \frac{(x - Np - k)^2}{2\zeta^2} \\ & \leq \max\left\{\frac{(x - Np - k)^2}{2x^2}, \frac{(x - Np - k)^2}{2(Np + k)^2}\right\} \leq \frac{(x - Np - k)^2}{2x^2} + \frac{(x - Np - k)^2}{2(Np + k)^2}. \end{aligned} \quad (54)$$

Now let  $X - k$  be a Bino( $N, p$ ) random variable. By taking expectation on both sides, we have:

$$\begin{aligned} & -\mathbb{E}[\log X] + \log(Np + k) + \frac{\mathbb{E}[X] - Np - k}{Np + k} \\ & \leq \mathbb{E}\left[\frac{(X - Np - k)^2}{2X^2}\right] + \frac{\mathbb{E}[(X - Np - k)^2]}{2(Np + k)^2}. \end{aligned} \quad (55)$$

Since  $\mathbb{E}[X] = Np + k$ ,  $\mathbb{E}[(X - Np - k)^2] = \text{Var}[X] = Np(1 - p)$ , and

$$\begin{aligned}
\mathbb{E}\left[\frac{(X - Np - k)^2}{2X^2}\right] &= \sum_{j=0}^N \frac{(j - Np)^2}{2(j + k)^2} \binom{N}{j} p^j (1 - p)^{N-j} \\
&\leq \sum_{j=0}^N \frac{(j - Np)^2}{2(j + 2)(j + 1)} \binom{N}{j} p^j (1 - p)^{N-j} \\
&= \sum_{j=0}^N \frac{(j - Np)^2}{2(N + 2)(N + 1)p^2} \binom{N + 2}{j + 2} p^{j+2} (1 - p)^{N-j} \\
&\leq \frac{1}{2(N + 2)(N + 1)p^2} \mathbb{E}_{Y \sim \text{Bino}(N+2, p)}[(Y - Np)^2] \\
&= \frac{(N + 2)p(1 - p) + 4p^2}{2(N + 2)(N + 1)p} \leq \frac{(N + 2)p}{2(N + 2)(N + 1)p} \leq \frac{1}{2Np} \quad (56)
\end{aligned}$$

for  $k \geq 2$  and  $N \geq 4$ . Plug these in (55), we have

$$\begin{aligned}
-\mathbb{E}[\log X] + \log(Np + k) &\leq \frac{1}{2Np} + \frac{Np(1 - p)}{2(Np + k)^2} \\
&\leq \frac{1}{Np + k} + \frac{1}{2(Np + k)} = \frac{3}{2(Np + k)}. \quad (57)
\end{aligned}$$

where  $1/(2Np) \leq 1/(Np + k)$  comes from the fact that  $Np \geq k$ .

(ii)  $Np < k$ . In this case, for any  $x$ , by applying Taylor's theorem around  $x_0 = Np + k$ , there exists  $\zeta$  between  $x$  and  $x_0$  such that

$$\log(x) = \log(Np + k) + \frac{x - Np - k}{Np + k} - \frac{(x - Np - k)^2}{2\zeta^2} \quad (58)$$

By noticing that  $\zeta \geq \min\{x, x_0\} \geq k \geq (Np + k)/2$ , we have:

$$-\log(x) + \log(Np + k) + \frac{x - Np - k}{Np + k} \leq \frac{2(x - Np - k)^2}{(Np + k)^2}. \quad (59)$$

Similarly, by taking expectation on both sides, we have

$$-\mathbb{E}[\log X] + \log(Np + k) + \frac{\mathbb{E}[X] - Np - k}{Np + k} \leq \frac{\mathbb{E}[2(X - Np - k)^2]}{(Np + k)^2}. \quad (60)$$

By plugging in  $\mathbb{E}[X] = Np + k$  and  $\mathbb{E}[(X - Np - k)^2] = \text{Var}[X] = Np(1 - p)$ , we obtain

$$-\mathbb{E}[\log X] + \log(Np + k) \leq \frac{2Np(1 - p)}{(Np + k)^2} \leq \frac{2(Np + k)}{(Np + k)^2} = \frac{2}{Np + k}. \quad (61)$$

Combining the two cases, we obtain the desired statement.

## C Proof of Theorem 2

We use the Efron-Stein inequality to bound the variance of the estimator. For simplicity, let  $\widehat{I}^{(N)}(Z)$  be the estimate based on original samples  $\{Z_1, Z_2, \dots, Z_N\}$ , where  $Z_i = (X_i, Y_i)$ . For the usage of Efron-Stein inequality, we consider another set of i.i.d. samples  $\{Z'_1, Z'_2, \dots, Z'_n\}$  drawn from  $P_{XY}$ . Let  $\widehat{I}^{(N)}(Z^{(j)})$  be the estimate based on  $\{Z_1, \dots, Z_{j-1}, Z'_j, Z_{j+1}, \dots, Z_N\}$ . Then Efron-Stein inequality states that

$$\text{Var}\left[\widehat{I}^{(N)}(Z)\right] \leq \frac{1}{2} \sum_{j=1}^N \mathbb{E}\left[\left(\widehat{I}^{(N)}(Z) - \widehat{I}^{(N)}(Z^{(j)})\right)^2\right]. \quad (62)$$

Now we will give an upper bound for the difference  $|\hat{I}^{(N)}(Z) - \hat{I}^{(N)}(Z^{(j)})|$  for given index  $j$ . First of all, let  $\hat{I}^{(N)}(Z_{\setminus j})$  be the estimate based on  $\{Z_1, \dots, Z_{j-1}, Z_{j+1}, \dots, Z_N\}$ , then by triangle inequality, we have:

$$\begin{aligned}
& \sup_{Z_1, \dots, Z_N, Z'_j} \left| \hat{I}^{(N)}(Z) - \hat{I}^{(N)}(Z^{(j)}) \right| \\
& \leq \sup_{Z_1, \dots, Z_N, Z'_j} \left( \left| \hat{I}^{(N)}(Z) - \hat{I}^{(N)}(Z_{\setminus j}) \right| + \left| \hat{I}^{(N)}(Z_{\setminus j}) - \hat{I}^{(N)}(Z^{(j)}) \right| \right) \\
& \leq \sup_{Z_1, \dots, Z_N} \left| \hat{I}^{(N)}(Z) - \hat{I}^{(N)}(Z_{\setminus j}) \right| + \sup_{Z_1, \dots, Z_{j-1}, Z'_j, Z_{j+1}, \dots, Z_N} \left| \hat{I}^{(N)}(Z_{\setminus j}) - \hat{I}^{(N)}(Z^{(j)}) \right| \\
& = 2 \sup_{Z_1, \dots, Z_N} \left| \hat{I}^{(N)}(Z) - \hat{I}^{(N)}(Z_{\setminus j}) \right| \tag{63}
\end{aligned}$$

where the last equality comes from the fact that  $\{Z_1, \dots, Z_{j-1}, Z'_j, Z_{j+1}, \dots, Z_N\}$  has the same joint distribution as  $\{Z_1, \dots, Z_N\}$ . Now recall that

$$\hat{I}^{(N)}(Z) = \frac{1}{N} \sum_{i=1}^N \xi_i(Z) = \frac{1}{N} \sum_{i=1}^N \left( \psi(\tilde{k}_i) + \log N - \log(n_{x,i} + 1) - \log(n_{y,i} + 1) \right), \tag{64}$$

Therefore, we have

$$\sup_{Z_1, \dots, Z_N, Z'_j} \left| \hat{I}^{(N)}(Z) - \hat{I}^{(N)}(Z^{(j)}) \right| \leq \frac{2}{N} \sup_{Z_1, \dots, Z_N} \sum_{i=1}^N \left| \xi_i(Z) - \xi_i(Z_{\setminus j}) \right|. \tag{65}$$

Now we need to upper-bound the difference  $|\xi_i(Z) - \xi_i(Z_{\setminus j})|$  created by eliminating sample  $Z_j$  for different  $i$ 's. There are three cases of  $i$ 's as follows,

- **Case I.**  $i = j$ . Since the upper bounds  $|\xi_i(Z)| \leq 2 \log N$  and  $|\xi_i(Z_{\setminus j})| \leq 2 \log(N-1)$  always holds, so  $|\xi_i(Z) - \xi_i(Z_{\setminus j})| \leq 4 \log N$ . The number of  $i$ 's in this case is only 1. So  $\sum_{\text{Case I}} |\xi_i(Z) - \xi_i(Z_{\setminus j})| \leq 4 \log N$ .
- **Case II.**  $\rho_{i,xy} = 0$ . In this case, recall that  $\tilde{k}_i = \left| \{i' \neq i : Z_i = Z_{i'}\} \right|$ ,  $n_{x,i} = \left| \{i' \neq i : X_i = X_{i'}\} \right|$  and  $n_{y,i} = \left| \{i' \neq i : Y_i = Y_{i'}\} \right|$ . There are 4 sub-cases in this case.

- **Case II.1.**  $Z_i = Z_j$ . By eliminating  $Z_j$ ,  $\tilde{k}_i$ ,  $n_{x,i}$ ,  $n_{y,i}$  will all decrease by 1. Therefore,

$$\begin{aligned}
& |\xi_i(Z) - \xi_i(Z_{\setminus j})| \\
& = \left| \left( \psi(\tilde{k}_i) + \log N - \log(n_{x,i} + 1) - \log(n_{y,i} + 1) \right) \right. \\
& \quad \left. - \left( \psi(\tilde{k}_i - 1) + \log(N-1) - \log(n_{x,i}) - \log(n_{y,i}) \right) \right| \\
& \leq |\psi(\tilde{k}_i) - \psi(\tilde{k}_i - 1)| + |\log N - \log(N-1)| \\
& \quad + |\log(n_{x,i} + 1) - \log(n_{x,i})| + |\log(n_{y,i} + 1) - \log(n_{y,i})| \\
& \leq \frac{1}{\tilde{k}_i - 1} + \frac{1}{N-1} + \frac{1}{n_{x,i}} + \frac{1}{n_{y,i}} \leq \frac{4}{\tilde{k}_i - 1} = \frac{4}{\tilde{k}_j - 1}. \tag{66}
\end{aligned}$$

The number of  $i$ 's in this case is the number of  $i$ 's such that  $Z_i = Z_j$ , which is just  $\tilde{k}_j$ .

Therefore,  $\sum_{\text{Case II.1}} |\xi_i(Z) - \xi_i(Z_{\setminus j})| \leq 4\tilde{k}_j/(\tilde{k}_j - 1) \leq 8$ , for  $\tilde{k}_j \geq k \geq 2$ .

- **Case II.2.**  $X_i = X_j$  but  $Y_i \neq Y_j$ . By eliminating  $Z_j$ ,  $\tilde{k}_i$  and  $n_{y,i}$  won't change but  $n_{x,i}$  will decrease by 1. Therefore,

$$\begin{aligned}
|\xi_i(Z) - \xi_i(Z_{\setminus j})| & \leq |\log N - \log(N-1)| + |\log(n_{x,i} + 1) - \log(n_{x,i})| \\
& \leq \frac{1}{N-1} + \frac{1}{n_{x,i}} \leq \frac{2}{n_{x,i}} = \frac{2}{n_{x,j}} \tag{67}
\end{aligned}$$

The number of  $i$ 's in this case is the number of  $i$ 's such that  $X_i = X_j$  but  $Y_i \neq Y_j$ , which is less than  $n_{x,j}$ . Therefore,  $\sum_{\text{Case II.2}} |\xi_i(Z) - \xi_i(Z_{\setminus j})| \leq 2n_{x,j}/n_{x,j} \leq 2$ .

- **Case II.3.**  $Y_i = Y_j$  but  $X_i \neq X_j$ . By eliminating  $Z_j$ ,  $\tilde{k}_i$  and  $n_{x,i}$  won't change but  $n_{y,i}$  will decrease by 1. Similarly as Case II.2, we have  $\sum_{\text{Case II.3}} |\xi_i(Z) - \xi_i(Z_{\setminus j})| \leq 2$ .
- **Case II.4.**  $X_i \neq X_j$  and  $Y_i \neq Y_j$ . In this case, none of  $\tilde{k}_i$ ,  $n_{x,i}$ , or  $n_{y,i}$  will change. So  $|\xi_i(Z) - \xi_i(Z_{\setminus j})| = \log N - \log(N-1) \leq 1/(N-1)$ . The number of  $i$ 's in this case is simply less than  $N-1$ . Therefore,  $\sum_{\text{Case II.4}} |\xi_i(Z) - \xi_i(Z_{\setminus j})| \leq 1$ .

Combining the four sub-cases, we conclude that  $\sum_{\text{Case II}} |\xi_i(Z) - \xi_i(Z_{\setminus j})| \leq 13$ .

- **Case III.**  $\rho_{i,xy} > 0$ . In this case, recall that  $\tilde{k}_i$  always equals to  $k$ ,  $n_{x,i} = \left| \{i' \neq i : \|X_i - X_{i'}\| \leq \rho_{i,xy}\} \right|$  and  $n_{y,i} = \left| \{i' \neq i : \|Y_i - Y_{i'}\| \leq \rho_{i,xy}\} \right|$ . Similar to Case II, there are 4 sub-cases.

- **Case III.1.**  $Z_j$  is in the  $k$ -nearest neighbors of  $Z_i$ . In this case, we don't know how  $n_{x,i}$  and  $n_{y,i}$  will change by eliminating  $Z_j$ , so we just use the loosest bound  $|\xi_i(Z) - \xi_i(Z_{\setminus j})| \leq 4 \log N$ . However, the number of  $i$ 's in this case is upper bounded by the following lemma.

**Lemma C.1.** Let  $Z, Z_1, Z_2, \dots, Z_N$  be vectors of  $\mathbb{R}^d$  and  $\mathcal{Z}_i$  be the set  $\{Z_1, \dots, Z_{i-1}, Z, Z_{i+1}, \dots, Z_N\}$ . Then

$$\sum_{i=1}^N \mathbb{I}\{Z \text{ is in the } k\text{-nearest neighbors of } Z_i \text{ in } \mathcal{Z}_i\} \leq k\gamma_d, \quad (68)$$

(distance ties are broken by comparing indices). Here  $\gamma_d$  is the minimum number of cones with angle smaller than  $\pi/6$  needed to cover  $\mathbb{R}^d$ . Moreover, if we allow  $k$  to be different for different  $i$ , we have

$$\sum_{i=1}^N \frac{1}{k_i} \mathbb{I}\{Z \text{ is in the } k_i\text{-nearest neighbors of } Z_i \text{ in } \mathcal{Z}_i\} \leq \gamma_d(\log N + 1). \quad (69)$$

By the first inequality in Lemma C.1, the number of  $i$ 's in this case is upper bounded by  $k\gamma_d$ . Therefore,  $\sum_{\text{Case III.1}} |\xi_i(Z) - \xi_i(Z_{\setminus j})| \leq 4k\gamma_{d_x+d_y} \log N$ .

- **Case III.2.**  $Z_j$  is not in the  $k$ -nearest neighbors of  $Z_i$ , but  $\|X_j - X_i\| \leq \rho_{i,xy}$ , i.e.,  $X_j$  is in the  $n_{x,i}$ -nearest neighbors of  $X_i$ . In this case,  $n_{x,i}$  will decrease by 1 and  $n_{y,i}$  remains the same. So

$$\begin{aligned} |\xi_i(Z) - \xi_i(Z_{\setminus j})| &\leq |\log N - \log(N-1)| + |\log(n_{x,i} + 1) - \log(n_{x,i})| \\ &\leq \frac{1}{N-1} + \frac{1}{n_{x,i}} \leq \frac{2}{n_{x,i}} \end{aligned} \quad (70)$$

We don't have an upper bound for the number of  $i$ 's in this case, but from the second inequality in Lemma C.1, we have the following upper bound, where  $\mathcal{X}_{i,j} = \{X_1, \dots, X_{i-1}, X_j, X_{i+1}, \dots, X_N\}$ :

$$\begin{aligned} &\sum_{\text{Case III.2}} |\xi_i(Z) - \xi_i(Z_{\setminus j})| \\ &\leq \sum_{i=1}^N \frac{2}{n_{x,i}} \mathbb{I}\{X_j \text{ is in the } n_{x,i}\text{-nearest neighbors of } X_i \text{ in } \mathcal{X}_{i,j}\} \\ &\leq 2\gamma_{d_x}(\log N + 1) \leq 2\gamma_{d_x+d_y}(\log N + 1). \end{aligned} \quad (71)$$

- **Case III.3.**  $Z_j$  is not in the  $k$ -nearest neighbors of  $Z_i$ , but  $\|Y_j - Y_i\| \leq \rho_{i,xy}$ , i.e.,  $Y_j$  is in the  $n_{y,i}$ -nearest neighbors of  $Y_i$ . In this case,  $n_{y,i}$  will decrease by 1 and  $n_{x,i}$  remains the same. Follow the same analysis in Case III.2, we have  $\sum_{\text{Case III.2}} |\xi_i(Z) - \xi_i(Z_{\setminus j})| \leq 2\gamma_{d_x+d_y}(\log N + 1)$  as well.
- **Case III.4.**  $Z_j$  is not in the  $k$ -nearest neighbors of  $Z_i$ , and  $\|X_j - X_i\| > \rho_{i,xy}$ ,  $\|Y_j - Y_i\| > \rho_{i,xy}$ . In this case, neither  $n_{x,i}$  nor  $n_{y,i}$  will change. Similar to Case II.4,  $\sum_{\text{Case III.4}} |\xi_i(Z) - \xi_i(Z_{\setminus j})| \leq 1$ .

Combining the four sub-cases, we conclude that  $\sum_{\text{Case III}} |\xi_i(Z) - \xi_i(Z_{\setminus j})| \leq (4k + 4)\gamma_{d_x+d_y} \log N + 4\gamma_{d_x+d_y} + 1$ .

Combining the three cases, we have:

$$\begin{aligned} \sum_{i=1}^N \left| \xi_i(Z) - \xi_i(Z_{\setminus j}) \right| &\leq 4 \log N + 13 + (4k + 4)\gamma_{d_x+d_y} \log N + 4\gamma_{d_x+d_y} + 1 \\ &\leq 30\gamma_{d_x+d_y} k \log N \end{aligned} \quad (72)$$

for  $k \geq 1$ ,  $\log N \geq 1$  and all  $\{Z_1, \dots, Z_N\}$ . Plug it into (65), we obtain,

$$\sup_{Z_1, \dots, Z_N, Z'_j} \left| \hat{I}^{(N)}(Z) - \hat{I}^{(N)}(Z^{(j)}) \right| \leq \frac{60\gamma_{d_x+d_y} k \log N}{N}. \quad (73)$$

Plug it into Efron-Stein inequality (62), we obtain:

$$\begin{aligned} \text{Var} \left[ \hat{I}^{(N)}(Z) \right] &\leq \frac{1}{2} \sum_{j=1}^N \mathbb{E} \left[ \left( \hat{I}^{(N)}(Z) - \hat{I}^{(N)}(Z^{(j)}) \right)^2 \right] \\ &\leq \frac{1}{2} \sum_{j=1}^N \sup_{Z_1, \dots, Z_N, Z'_j} \left( \hat{I}^{(N)}(Z) - \hat{I}^{(N)}(Z^{(j)}) \right)^2 \\ &\leq \frac{1}{2} \sum_{j=1}^N \left( \frac{60\gamma_{d_x+d_y} k \log N}{N} \right)^2 = \frac{1800\gamma_{d_x+d_y}^2 (k \log N)^2}{N}. \end{aligned} \quad (74)$$

Since  $1800\gamma_{d_x+d_y}^2$  is a constant independent of  $N$ , and  $(k_N \log N)^2/N \rightarrow 0$  as  $N \rightarrow \infty$  by Assumption 6, we have  $\lim_{N \rightarrow \infty} \text{Var} \left[ \hat{I}^{(N)}(Z) \right] = 0$ .

### C.1 Proof of Lemma C.1

For the first part of the lemma, we refer to Lemma 20.6 in [5].

The second part of the lemma is a consequence of the first part. We reorder the indices  $i$ 's by  $k_i$  and rewrite the summation as follows,

$$\begin{aligned} &\sum_{i=1}^N \frac{1}{k_i} \mathbb{I}\{Z \text{ is in the } k_i\text{-nearest neighbors of } Z_i \text{ in } \mathcal{Z}_i\} \\ &= \sum_{k=1}^N \frac{1}{k} \sum_{i=1}^N \mathbb{I}\{k_i = k\} \mathbb{I}\{Z \text{ is in the } k\text{-nearest neighbors of } Z_i \text{ in } \mathcal{Z}_i\} \\ &= \sum_{k=1}^N \frac{1}{k} \sum_{i=1}^N \mathbb{I}\{k_i = k \text{ and } Z \text{ is in the } k\text{-nearest neighbors of } Z_i \text{ in } \mathcal{Z}_i\} \end{aligned} \quad (75)$$

Notice that we take the summation over  $k = 1$  to  $N$  since each  $k_i$  can not be more than  $N$ . Denote  $S_k = \sum_{i=1}^N \mathbb{I}\{k_i = k \text{ and } Z \text{ is in the } k\text{-nearest neighbors of } Z_i \text{ in } \mathcal{Z}_i\}$  for simplicity. Then we need to prove that  $\sum_{k=1}^N (S_k/k) \leq \gamma_d \log N$ . By the first part of this lemma, we obtain,

$$\begin{aligned} \sum_{\ell=1}^k S_\ell &= \sum_{\ell=1}^k \sum_{i=1}^N \mathbb{I}\{k_i = \ell \text{ and } Z \text{ is in the } \ell\text{-nearest neighbors of } Z_i \text{ in } \mathcal{Z}_i\} \\ &= \sum_{i=1}^N \sum_{\ell=1}^k \mathbb{I}\{k_i = \ell \text{ and } Z \text{ is in the } \ell\text{-nearest neighbors of } Z_i \text{ in } \mathcal{Z}_i\} \\ &\leq \sum_{i=1}^N \mathbb{I}\{k_i \leq k \text{ and } Z \text{ is in the } k\text{-nearest neighbors of } Z_i \text{ in } \mathcal{Z}_i\} \\ &\leq k\gamma_d. \end{aligned} \quad (76)$$

Therefore, we obtain

$$\begin{aligned}
\sum_{k=1}^N \frac{S_k}{k} &= \sum_{k=1}^{N-1} \frac{1}{k(k+1)} \left( \sum_{\ell=1}^k S_\ell \right) + \frac{1}{N} \sum_{\ell=1}^N S_\ell \\
&\leq \sum_{k=1}^{N-1} \frac{k\gamma_d}{k(k+1)} + \frac{N\gamma_d}{N} = \sum_{k=1}^N \frac{\gamma_d}{k} < \gamma_d(\log N + 1) ,
\end{aligned} \tag{77}$$

which completes the proof.
